# Supplementary figures and images for: Structure and magnetic properties of a nickel(ii) complex of a tridentate verdazyl radical: strong ferromagnetic metal-radical exchange coupling
Source: Royal Society of Chemistry journal article supplement (doi:10.1039/b006520j), 2000-01-01

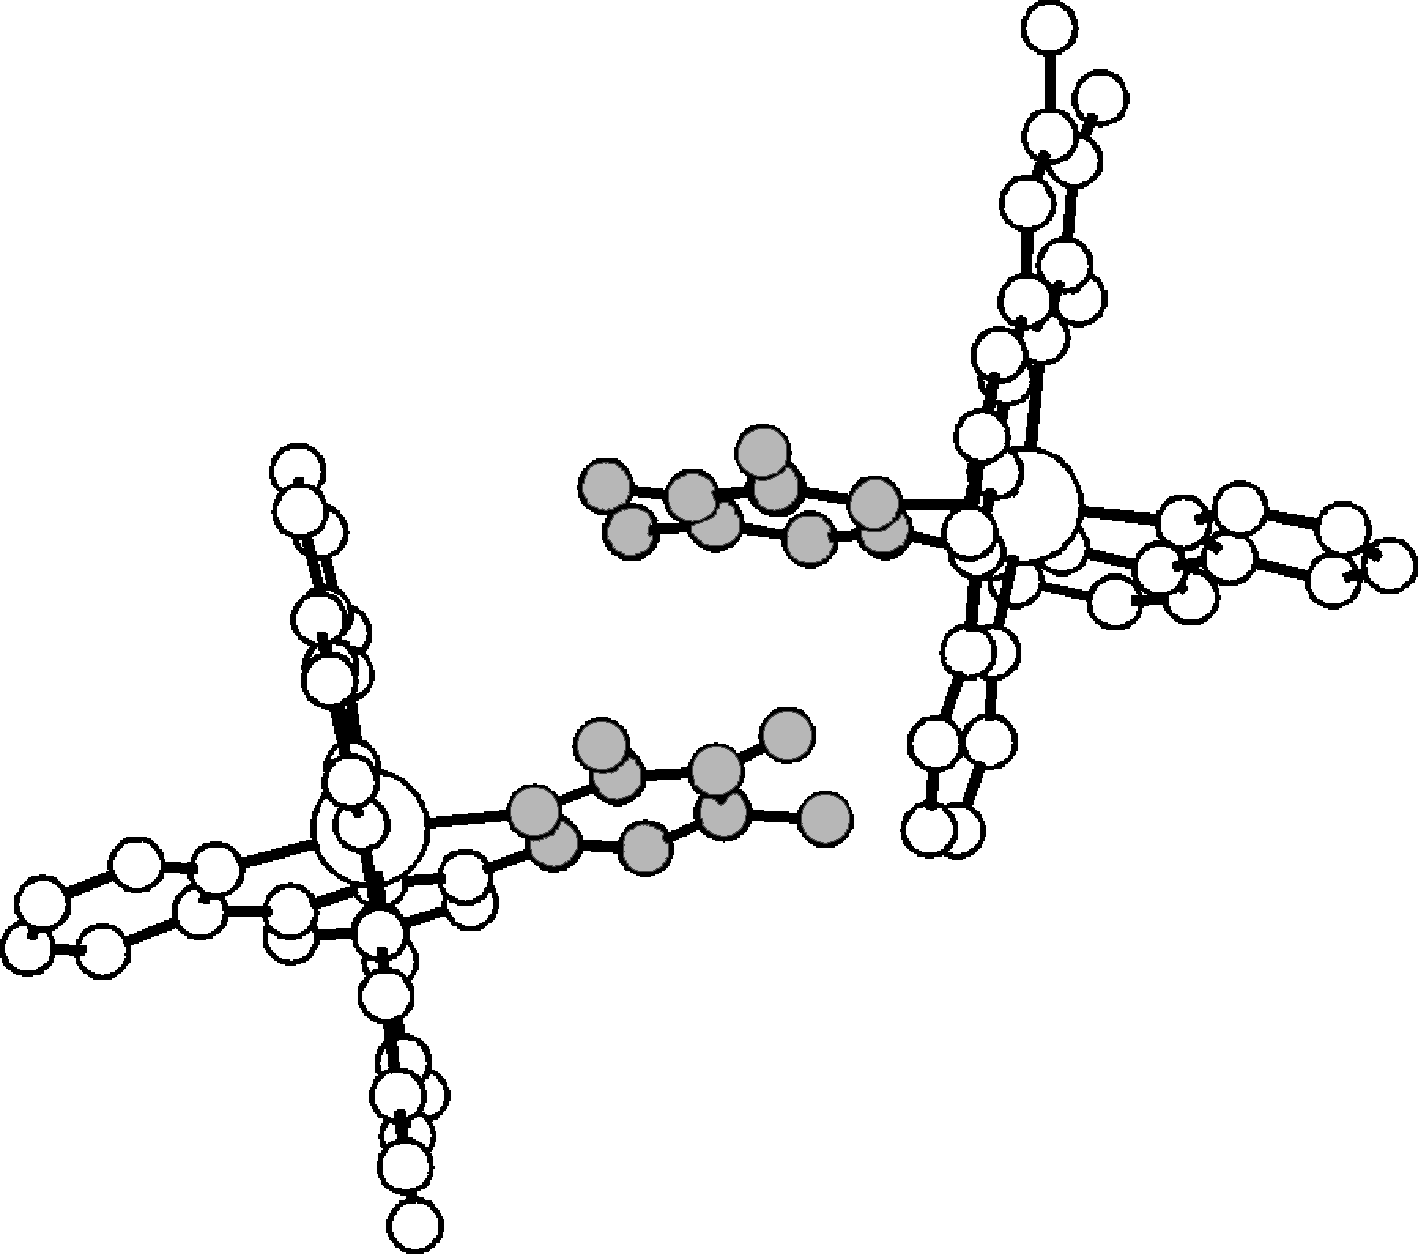

Supplement: b006520j.doc [file b006520j.doc]
